# Supplementary material
Source: PubMed Central journal article supplement (PMC2658531)
Supplement: NIHMS68429-supplement-01.pdf [file NIHMS68429-supplement-01.pdf]

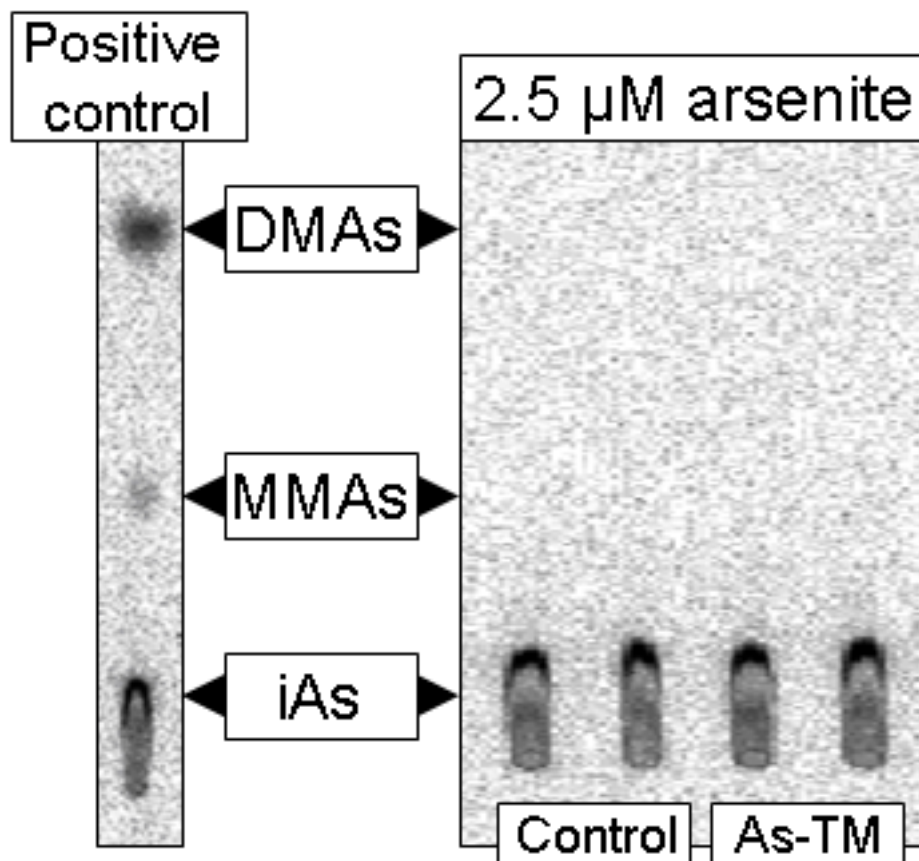

Fig. S1. **TLC Analysis of Radiolabeled Arsenic Metabolites.** iAs, inorganic arsenic; MAs, monomethylated arsenic; DMAs, dimethylated arsenic. After cells were incubated with  $^{73}\text{As}$ -Arsenite for 24 hours, cells and medium were pooled, treated with 2M CuCl (pH 1), and boiled for 5 minutes. Supernatants were oxidized with 10%  $\text{H}_2\text{O}_2$  and separated by ion-exchange TLC on PEI-F cellulose with an acetone-acetic acid-water (2:1:1) mobile phase. Radioactivity distribution was analyzed by a phosphorimager. UROtsa (human bladder cells) expressing rat As-methyltransferase (Cyt19) was used as positive controls.

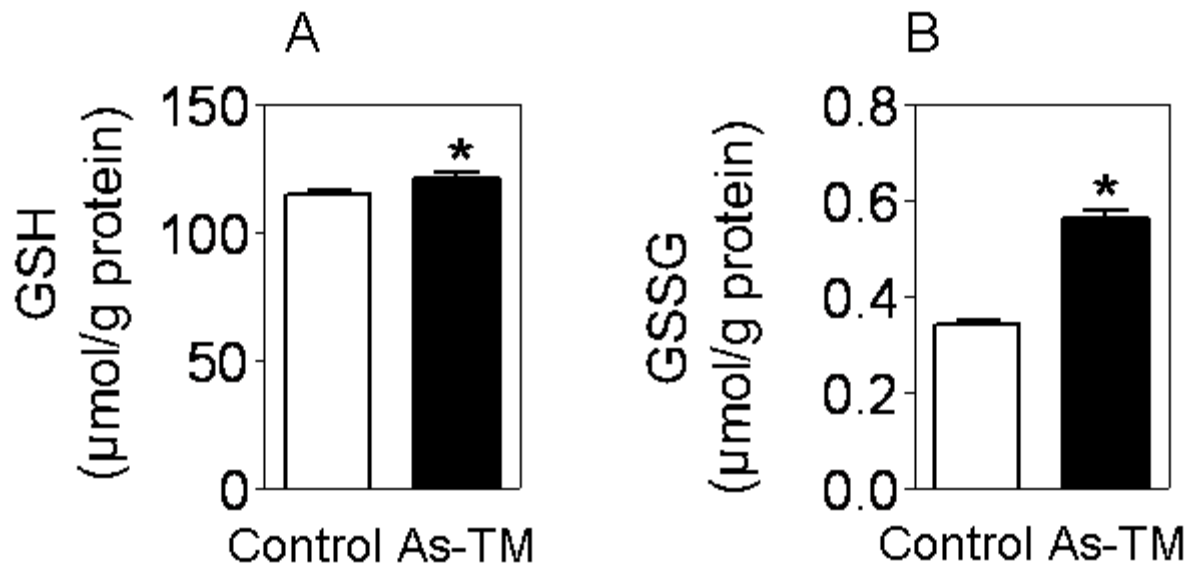

Fig. S2. Intracellular GSH (A) and GSSG (B) in As-TM and control cells.  $n = 6$ ; \*,  $p < 0.05$  compared with control cells. Levels of GSH and GSSG in cells were measured immediately after collection using BIOXYTECH GSH/GSSG-412 kit (OxisResearch, Portland, OR). Briefly, As-TM and control cells cultured in arsenic-free medium for 1 week were rinsed three times with cold PBS and sonicated in cold PBS with 1% SDS, followed by an immediate centrifugation at  $12,000 \times g$  for 5 min. The resulting supernatants were used for measurement of GSSG and total glutathione (GSH+GSSG), respectively. Samples for GSSG measurement were immediately mixed with thiol-scavenging reagent M2VP (1-methyl-2-vinyl-pyridium trifluoromethane sulfonate) after separation.

Table S1 Primer sequences for real-time RT-PCR

| Gene name      | Gene bank number | Sequence                                                                  |
|----------------|------------------|---------------------------------------------------------------------------|
| Keratin-1      | NM_006121        | GACCACCACCCACATGACATT (forward);<br>TCCACACCCTGGGTCTAACTG (reverse)       |
| Keratin-10     | M19156           | CGAGTCTTCATCTAAGGGACCAA (forward);<br>GAGACTCTCTCCTCTTGATGCAGTT (reverse) |
| Involucrin     | M13903           | ACTTATTTCTGGGTCCGCTAGGT (forward);<br>CCCTCACCCCATTAAGAGACA (reverse)     |
| Loricrin       | M63394           | GGCACCGATGGGCTTAGAG (forward);<br>GCTCAATGGCTTCTTCCAGGTA (reverse)        |
| CK2 $\alpha$   | M55265           | CAGTGAAAATCAGCACCTTGTC A (forward);<br>GGTGGTCATATCGCAGCAGTT (reverse)    |
| CK2 $\alpha'$  | M55268           | TCCCCGAGCCCCTCAA (forward);<br>TTAGCGTGGTTTGCTGGAAA (reverse)             |
| CK2 $\beta$    | M30448           | TGGTTTCCCTCACATGCTCTT (forward);<br>ACAAACTGGTTGGCAGGTCTCT (reverse)      |
| Nrf2           | NM_006164        | AACCAGTGGATCTGCCAACTACTC (forward);<br>CTGCGCCAAAAGCTGCAT (reverse)       |
| GCLC           | NM_001498        | GATGCTGTCTTGCAGGGAATG (forward);<br>AGCGAGCTCCGTGCTGTT (reverse)          |
| NQO1           | NM_000903        | ACTGCCCTCTTGTGGTGCAT (forward);<br>GCTCGGTCCAATCCCTTCAT (reverse)         |
| HO-1           | NM_002133        | GCCTGGAAGACACCCTAATGTG (forward);<br>GGCCGTGTCAACAAGGATACTT (reverse)     |
| $\beta$ -actin | X00351           | ACTGGAACGGTGAAGGTGACA (forward);<br>ATGGCAAGGGACTTCCTGTAAC (reverse)      |
